# Supplementary material for: Longitudinal Assessment of Hip Fractures-Diabetes Causality in Aging Populations: Evidence from the China Health and Retirement Longitudinal Study Cohort
Source: Research Square preprint supplement (doi:10.21203/rs.3.rs-6803079/v1), 2025-07-15
Supplement: Supplementary file 1 [file e50bd23b386f65a93b63ab66.docx]

**Additional File 1**

Yutong Lin, Frank F. Huang, Jiacong Xiao, Xingling Chen, Yuchen Wu, Daniel K.Y. Zheng, Jeremy R. Chang, Haibin Wang, Jiandong He.Longitudinal Assessment of Hip Fractures-Diabetes Causality in Aging Populations: Evidence from the China Health and Retirement Longitudinal Study Cohort.

**Supplemental materials**

[The Specific Evaluation Methods for Balance Ability, Grip Strength and Chair stand test. 1](#_Toc196941883)

[Table S1. Multivariable Cox regression analysis for diabetes in all participants. 2](#_Toc196941884)

[Table S2. Multivariable Cox regression analysis for diabetes in the male subgroup. 4](#_Toc196941885)

[Table S3. Multivariable Cox regression analysis for diabetes in the female subgroup. 5](#_Toc196941886)

[Table S4. Multivariable Cox regression analysis for diabetes in the 45-59 age subgroup. 6](#_Toc196941887)

[Table S5. Multivariable Cox regression analysis for diabetes in the 60-69 age subgroup. 7](#_Toc196941888)

[Table S6. Multivariable Cox regression analysis for diabetes in the 70-79 age subgroup. 8](#_Toc196941889)

[Table S7. Multivariable Cox regression analysis for diabetes in the 80+ age subgroup. 9](#_Toc196941890)

[Table S8. Multivariable Cox regression analysis for diabetes in the underweight subgroup. 10](#_Toc196941891)

[Table S9. Multivariable Cox regression analysis for diabetes in the normal weight subgroup. 11](#_Toc196941892)

[Table S10. Multivariable Cox regression analysis for diabetes in the overweight subgroup. 12](#_Toc196941893)

[Table S11. Multivariable Cox regression analysis for diabetes in the obesity subgroup. 13](#_Toc196941894)

[Table S12. Schoenfeld residuals test for proportional hazards assumption in Cox model. 14](#_Toc196941895)

[Table S13. Mediation analysis of Traditional herbal medicines, Tonic health supplements, depression and sleep duration in the male and obesity subgroups. 15](#_Toc196941896)

[Table S14. SEM model fit test results in the male subgroup. 16](#_Toc196941897)

[Table S15. SEM path coefficients and significance in the male subgroup. 16](#_Toc196941898)

[Table S16. SEM model fit test results in the obesity subgroup. 26](#_Toc196941899)

[Table S17. SEM path coefficients and significance in the obesity subgroup. 26](#_Toc196941900)

# The Specific Evaluation Methods for Balance Ability, Grip Strength and Chair stand test.

Balance ability was evaluated using three stance positions: semi-tandem, tandem, and feet-together stances. During these tasks, participants were allowed to use their arms, bend their knees, or shift their body to maintain balance, but they were instructed to minimize foot movement. The test duration varied by age group: participants aged ≥70 years performed a 30-second tandem stance test, while those aged <70 years completed a 60-second tandem stance test. Performance was scored using the following system: inability to complete the test was scored as 0 points; standing with feet together for 10 seconds or performing a semi-tandem stance for <10 seconds was scored as 1 point; holding a semi-tandem stance for ≥10 seconds or a tandem stance for <30/60 seconds was scored as 2 points; and holding a tandem stance for ≥30/60 seconds was scored as 3 points [1]. Grip strength was measured using a dynamometer (Yuejian™ WL-100, Nantong, China), with two measurements taken for each hand. Participants were instructed to stand upright, maintain a 90-degree elbow angle, and grip the dynamometer with maximal force for a few seconds before releasing it. The test was conducted twice per hand, and the final result was recorded as the average measurement for the participant's dominant hand [2]. For the Chair stand test, participants were required to cross their arms over their chest and transition from a seated to a standing position as quickly as possible, repeating the movement five times consecutively. They were not permitted to pause between repetitions or use their arms for assistance. Upon completion of the test, the average time per repetition over the five trials was calculated and used for scoring: ≥3.33 seconds was assigned 1 point, 2.73–3.32 seconds was assigned 2 points, 2.23–2.72 seconds was assigned 3 points, and ≤2.22 seconds was assigned 4 points. Participants who were unable to complete the test received a score of 0 [3].

**References**

1. Zhong B-X, Zhong H-L, Zhou G-Q *et al.* Physical performance and risk of Hip fractures in community-dwelling elderly people in China: A 4-year longitudinal cohort study. *Maturitas* 2021;**146**:26–33.

2. Zhou S, Si H, Wu L *et al.* Association between Handgrip strength weakness and asymmetry with incident Hip fractures among older Chinese adults. *Archives of Gerontology and Geriatrics* 2024;**122**:105385.

3. Guralnik JM, Ferrucci L, Pieper CF *et al.* Lower extremity function and subsequent disability: consistency across studies, predictive models, and value of gait speed alone compared with the short physical performance battery. *J Gerontol A Biol Sci Med Sci* 2000;**55**:M221-231.

# Table S1. Multivariable Cox regression analysis for diabetes in all participants.

| Term | HR | 95% CI | *P*-value |
| --- | --- | --- | --- |
| Hip fractures | 1.16 | 0.62,2.17 | 0.65 |
| Age | 0.99 | 0.98,1.00 | 0.10 |
| Gender | 1.07 | 0.85,1.35 | 0.57 |
| BMI | 1.06 | 1.04,1.07 | <0.01* |
| History of falls | 1.03 | 0.82,1.29 | 0.78 |
| Smoke | 0.93 | 0.73,1.18 | 0.54 |
| Hypertension | 1.57 | 1.30,1.90 | <0.01* |
| Dyslipidemia | 1.24 | 0.95,1.62 | 0.12 |
| Asthma | 1.01 | 0.63,1.63 | 0.96 |
| Cancer or malignant tumor | 1.83 | 0.94,3.55 | 0.07 |
| Chronic lung diseases | 1.09 | 0.81,1.46 | 0.56 |
| Liver disease | 1.37 | 0.95,1.98 | 0.10 |
| Heart problems | 1.38 | 1.09,1.74 | 0.01* |
| Stroke | 1.06 | 0.61,1.84 | 0.83 |
| Kidney disease | 1.02 | 0.73,1.43 | 0.90 |
| Stomach or other digestive disease | 1.11 | 0.91,1.36 | 0.28 |
| Emotional nervous or psychiatric problems | 0.71 | 0.29,1.72 | 0.45 |
| Memory related disease | 0.45 | 0.14,1.41 | 0.17 |
| Arthritis or rheumatism | 1.11 | 0.93,1.32 | 0.26 |
| Handgrip strength | 1.00 | 1.00,1.00 | 0.13 |
| Balance | 0.93 | 0.79,1.11 | 0.44 |
| Chair stand test | 0.90 | 0.83,0.99 | 0.02* |

**Notes:** The model was adjusted for variables including age, gender, BMI and other comorbidities. The analysis included data from all participants (n = 10,280, events (diabetes) = 559). BMI, Body Mass Index; CI, confidence intervals; HR, Hazard Ratios; * *P* < 0.05.

# Table S2. Multivariable Cox regression analysis for diabetes in the male subgroup.

| Term | HR | 95% CI | *P*-value |
| --- | --- | --- | --- |
| Hip fractures | 2.43 | 1.19,4.96 | 0.01* |
| Age | 0.99 | 0.97,1.00 | 0.16 |
| BMI | 1.06 | 1.04,1.08 | <0.01* |
| History of falls | 0.90 | 0.61,1.32 | 0.60 |
| Smoke | 1.00 | 0.75,1.34 | 1.00 |
| Hypertension | 1.45 | 1.07,1.97 | 0.02* |
| Dyslipidemia | 1.14 | 0.74,1.76 | 0.55 |
| Asthma | 1.02 | 0.48,2.17 | 0.95 |
| Cancer or malignant tumor | 2.18 | 0.54,8.80 | 0.28 |
| Chronic lung diseases | 0.85 | 0.53,1.37 | 0.52 |
| Liver disease | 1.50 | 0.87,2.57 | 0.14 |
| Heart problems | 1.70 | 1.16,2.50 | 0.01* |
| Stroke | 1.25 | 0.56,2.76 | 0.58 |
| Kidney disease | 0.90 | 0.53,1.53 | 0.70 |
| Stomach or other digestive disease | 1.05 | 0.76,1.44 | 0.78 |
| Emotional nervous or psychiatric problems | 0.63 | 0.09,4.51 | 0.64 |
| Memory related disease | 0.28 | 0.04,1.99 | 0.20 |
| Arthritis or rheumatism | 0.99 | 0.74,1.32 | 0.96 |
| Handgrip strength | 1.00 | 1.00,1.00 | 0.99 |
| Balance | 1.04 | 0.75,1.43 | 0.82 |
| Chair stand test | 0.95 | 0.82,1.11 | 0.55 |

**Notes:** The model was adjusted for variables including age, BMI and other comorbidities. The analysis included data from male participants only (n = 4880, events（diabetes）= 235). BMI, Body Mass Index; CI, confidence intervals; HR, Hazard Ratios; * P < 0.05.

# Table S3. Multivariable Cox regression analysis for diabetes in the female subgroup.

| Term | HR | 95%CI | *P*-value |
| --- | --- | --- | --- |
| Hip fractures | 0.36 | 0.09,1.45 | 0.15 |
| Age | 0.99 | 0.98,1.01 | 0.38 |
| BMI | 1.05 | 1.03,1.07 | <0.01* |
| History of falls | 1.10 | 0.83,1.45 | 0.52 |
| Smoke | 0.79 | 0.51,1.24 | 0.31 |
| Hypertension | 1.63 | 1.27,2.08 | <0.01* |
| Dyslipidemia | 1.32 | 0.93,1.86 | 0.12 |
| Asthma | 1.09 | 0.59,2.01 | 0.79 |
| Cancer or malignant tumor | 1.65 | 0.77,3.53 | 0.20 |
| Chronic lung diseases | 1.33 | 0.92,1.93 | 0.13 |
| Liver disease | 1.32 | 0.79,2.20 | 0.30 |
| Heart problems | 1.20 | 0.89,1.63 | 0.22 |
| Stroke | 0.95 | 0.44,2.06 | 0.89 |
| Kidney disease | 1.12 | 0.72,1.73 | 0.61 |
| Stomach or other digestive disease | 1.15 | 0.89,1.48 | 0.27 |
| Emotional nervous or psychiatric problems | 0.77 | 0.28,2.07 | 0.60 |
| Memory related disease | 0.69 | 0.17,2.83 | 0.61 |
| Arthritis or rheumatism | 1.17 | 0.93,1.48 | 0.17 |
| Handgrip strength | 1.00 | 1.00,1.00 | 0.03* |
| Balance | 0.89 | 0.72,1.10 | 0.28 |
| Chair stand test | 0.88 | 0.79,0.98 | 0.02* |

**Notes:** The model was adjusted for variables including age, BMI and other comorbidities. The analysis included data from female participants only (n = 5400, events (diabetes)= 324). BMI, Body Mass Index; CI, confidence intervals; HR, Hazard Ratios; * P < 0.05.

# Table S4. Multivariable Cox regression analysis for diabetes in the 45-59 age subgroup.

| Term | HR | 95%CI | *P*-value |
| --- | --- | --- | --- |
| Hip fractures | 1.35 | 0.60,3.04 | 0.47 |
| Gender | 1.00 | 0.73,1.37 | 0.99 |
| BMI | 1.06 | 1.04,1.08 | <0.01* |
| History of falls | 1.24 | 0.92,1.68 | 0.15 |
| Smoke | 0.94 | 0.68,1.31 | 0.73 |
| Hypertension | 1.63 | 1.26,2.11 | <0.01* |
| Dyslipidemia | 1.48 | 1.05,2.08 | 0.03* |
| Asthma | 1.19 | 0.54,2.61 | 0.67 |
| Cancer or malignant tumor | 1.76 | 0.71,4.32 | 0.22 |
| Chronic lung diseases | 0.83 | 0.53,1.31 | 0.43 |
| Liver disease | 1.56 | 0.98,2.47 | 0.06 |
| Heart problems | 1.45 | 1.04,2.02 | 0.03* |
| Stroke | 0.60 | 0.19,1.90 | 0.38 |
| Kidney disease | 1.19 | 0.79,1.82 | 0.41 |
| Stomach or other digestive disease | 1.20 | 0.92,1.55 | 0.17 |
| Emotional nervous or psychiatric problems | 0.52 | 0.13,2.11 | 0.36 |
| Memory related disease | 0.34 | 0.05,2.49 | 0.29 |
| Arthritis or rheumatism | 1.03 | 0.81,1.31 | 0.79 |
| Handgrip strength | 1.00 | 1.00,1.01 | 0.41 |
| Balance | 0.82 | 0.64,1.04 | 0.11 |
| Chair stand test | 0.91 | 0.80,1.03 | 0.15 |

**Notes:** The model was adjusted for variables including gender, BMI and other comorbidities. The analysis included data from participants aged 45 to 59 years only (n = 6019, events(diabetes) = 319). BMI, Body Mass Index; CI, confidence intervals; HR, Hazard Ratios; * P < 0.05.

# Table S5. Multivariable Cox regression analysis for diabetes in the 60-69 age subgroup.

| Term | HR | 95%CI | *P*-value |
| --- | --- | --- | --- |
| Hip fractures | 0.79 | 0.24,2.55 | 0.69 |
| Gender | 1.28 | 0.86,1.91 | 0.22 |
| BMI | 1.06 | 1.03,1.09 | <0.01* |
| History of falls | 0.75 | 0.50,1.14 | 0.18 |
| Smoke | 0.80 | 0.53,1.20 | 0.29 |
| Hypertension | 1.28 | 0.92,1.77 | 0.14 |
| Dyslipidemia | 1.02 | 0.63,1.65 | 0.95 |
| Asthma | 1.04 | 0.51,2.14 | 0.92 |
| Cancer or malignant tumor | 1.98 | 0.62,6.30 | 0.25 |
| Chronic lung diseases | 1.37 | 0.86,2.18 | 0.18 |
| Liver disease | 0.86 | 0.40,1.88 | 0.71 |
| Heart problems | 1.46 | 0.99,2.15 | 0.05 |
| Stroke | 2.41 | 1.20,4.83 | 0.01 |
| Kidney disease | 0.91 | 0.49,1.71 | 0.77 |
| Stomach or other digestive disease | 0.87 | 0.61,1.24 | 0.45 |
| Emotional nervous or psychiatric problems | 0.89 | 0.27,2.89 | 0.85 |
| Memory related disease | 0.83 | 0.20,3.42 | 0.80 |
| Arthritis or rheumatism | 1.04 | 0.76,1.42 | 0.80 |
| Handgrip strength | 1.00 | 1.00,1.00 | 0.28 |
| Balance | 1.13 | 0.84,1.51 | 0.41 |
| Chair stand test | 0.82 | 0.71,0.93 | <0.01* |

**Notes:** The model was adjusted for variables including gender, BMI and other comorbidities. The analysis included data from participants aged 60 to 69 years only (n = 2992, events(diabetes) = 183). BMI, Body Mass Index; CI, confidence intervals; HR, Hazard Ratios; * P < 0.05.

# Table S6. Multivariable Cox regression analysis for diabetes in the 70-79 age subgroup.

| Term | HR | 95%CI | *P*-value |
| --- | --- | --- | --- |
| Hip fractures | 1.23 | 0.17,9.14 | 0.84 |
| Gender | 0.77 | 0.38,1.55 | 0.46 |
| BMI | 1.05 | 1.01,1.10 | 0.02* |
| History of falls | 0.88 | 0.43,1.77 | 0.72 |
| Smoke | 1.08 | 0.53,2.19 | 0.82 |
| Hypertension | 2.10 | 1.18,3.73 | 0.01* |
| Dyslipidemia | 0.63 | 0.19,2.10 | 0.45 |
| Asthma | 0.75 | 0.21,2.71 | 0.66 |
| Cancer or malignant tumor | 1.88 | 0.25,14.15 | 0.54 |
| Chronic lung diseases | 1.22 | 0.54,2.76 | 0.63 |
| Liver disease | 2.64 | 0.90,7.79 | 0.08 |
| Heart problems | 0.82 | 0.38,1.77 | 0.61 |
| Stroke | 0.28 | 0.03,2.28 | 0.23 |
| Kidney disease | 0.54 | 0.13,2.33 | 0.41 |
| Stomach or other digestive disease | 1.36 | 0.72,2.59 | 0.34 |
| Emotional nervous or psychiatric problems | <0.01 | <0.01,NA | 1.00 |
| Memory related disease | <0.01 | <0.01,NA | 1.00 |
| Arthritis or rheumatism | 1.98 | 1.11,3.55 | 0.02* |
| Handgrip strength | 1.00 | 0.99,1.01 | 0.99 |
| Balance | 0.80 | 0.49,1.33 | 0.39 |
| Chair stand test | 1.09 | 0.84,1.41 | 0.84 |

**Notes:** The model was adjusted for variables including gender, BMI and other comorbidities. The analysis included data from participants aged 70 to 79 years only (n = 1088, events = 52). BMI, Body Mass Index; CI, confidence intervals; HR, Hazard Ratios; * P < 0.05.

# Table S7. Multivariable Cox regression analysis for diabetes in the 80+ age subgroup.

| Term | HR | 95%CI | *P*-value |
| --- | --- | --- | --- |
| Hip fractures | <0.01 | <0.01,NA | 1.00 |
| Gender | 5.01 | 0.06,455.24 | 0.48 |
| BMI | 1.16 | 0.97,1.40 | 0.11 |
| History of falls | 2.65 | 0.12,56.96 | 0.53 |
| Smoke | 0.09 | <0.01,24.41 | 0.40 |
| Hypertension | 0.01 | <0.01,5.58 | 0.15 |
| Dyslipidemia | <0.01 | <0.01,NA | 1.00 |
| Asthma | 0.24 | <0.01,76.24 | 0.63 |
| Cancer or malignant tumor | <0.01 | <0.01,NA | 1.00 |
| Chronic lung diseases | 564.22 | 2.85,111,721.70 | 0.02* |
| Liver disease | <0.01 | <0.01,NA | 1.00 |
| Heart problems | 2.54 | 0.09,71.07 | 0.58 |
| Stroke | <0.01 | <0.01,NA | 1.00 |
| Kidney disease | <0.01 | <0.01,NA | 1.00 |
| Stomach or other digestive disease | 200.44 | 0.74,54,333.89 | 0.06 |
| Emotional nervous or psychiatric problems | NA | NA, NA | NA |
| Memory related disease | <0.01 | <0.01,NA | 1.00 |
| Arthritis or rheumatism | 0.80 | 0.05,12.37 | 0.87 |
| Handgrip strength | 1.19 | 0.87,1.62 | 0.29 |
| Balance | 1.76 | 0.14,22.78 | 0.67 |
| Chair stand test | 3.18 | 0.60,16.88 | 1.00 |

**Notes:** The model was adjusted for variables including gender, BMI and other comorbidities. The analysis included data from participants aged above 80 years only (n = 181, events(diabetes) = 5). BMI, Body Mass Index; CI, confidence intervals; HR, Hazard Ratios; * P < 0.05.

# Table S8. Multivariable Cox regression analysis for diabetes in the underweight subgroup.

| Term | HR | 95%CI | *P*-value |
| --- | --- | --- | --- |
| Hip fractures | 2.13 | 0.25,17.90 | 0.49 |
| Age | 0.99 | 0.95,1.03 | 0.48 |
| Gender | 0.82 | 0.33,2.04 | 0.66 |
| History of falls | 0.93 | 0.37,2.32 | 0.88 |
| Smoke | 1.37 | 0.56,3.34 | 0.48 |
| Hypertension | 2.11 | 0.95,4.66 | 0.07 |
| Dyslipidemia | 0.97 | 0.21,4.53 | 0.97 |
| Asthma | 0.45 | 0.06,3.56 | 0.45 |
| Cancer or malignant tumor | <0.01 | <0.01,NA | 1.00 |
| Chronic lung diseases | 1.31 | 0.51,3.34 | 0.57 |
| Liver disease | 0.69 | 0.09,5.50 | 0.73 |
| Heart problems | 1.89 | 0.78,4.59 | 0.16 |
| Stroke | 1.29 | 0.15,11.10 | 0.81 |
| Kidney disease | 1.02 | 0.29,3.65 | 0.97 |
| Stomach or other digestive disease | 0.77 | 0.34,1.73 | 0.53 |
| Emotional nervous or psychiatric problems | <0.01 | <0.01,NA | 1.00 |
| Memory related disease | 4.12 | 0.50,34.10 | 0.19 |
| Arthritis or rheumatism | 1.50 | 0.72,3.13 | 0.28 |
| Handgrip strength | 0.98 | 0.94,1.02 | 0.41 |
| Balance | 2.17 | 0.91,5.19 | 0.08 |
| Chair stand test | 0.59 | 0.42,0.82 | <0.01* |

**Notes:** The model was adjusted for variables including age, gender and other comorbidities. The analysis included data from participants with a BMI less than 18.0 only. (n = 899, events(diabetes) = 34). BMI, Body Mass Index; CI, confidence intervals; HR, Hazard Ratios; * P < 0.05.

# Table S9. Multivariable Cox regression analysis for diabetes in the normal weight subgroup.

| Term | HR | 95%CI | *P*-value |
| --- | --- | --- | --- |
| Hip fractures | 0.99 | 0.31,3.12 | 0.99 |
| Age | 1.00 | 0.99,1.02 | 0.87 |
| Gender | 0.96 | 0.67,1.38 | 0.84 |
| History of falls | 0.75 | 0.50,1.13 | 0.17 |
| Smoke | 0.67 | 0.46,0.97 | 0.03* |
| Hypertension | 1.59 | 1.14,2.20 | 0.01* |
| Dyslipidemia | 0.92 | 0.50,1.66 | 0.77 |
| Asthma | 1.27 | 0.60,2.69 | 0.54 |
| Cancer or malignant tumor | 1.16 | 0.29,4.70 | 0.83 |
| Chronic lung diseases | 1.07 | 0.67,1.71 | 0.78 |
| Liver disease | 1.50 | 0.83,2.72 | 0.18 |
| Heart problems | 1.37 | 0.91,2.05 | 0.13 |
| Stroke | 0.80 | 0.25,2.57 | 0.70 |
| Kidney disease | 0.93 | 0.53,1.62 | 0.80 |
| Stomach or other digestive disease | 1.27 | 0.93,1.72 | 0.13 |
| Emotional nervous or psychiatric problems | 1.18 | 0.37,3.74 | 0.78 |
| Memory related disease | 0.42 | 0.06,3.07 | 0.40 |
| Arthritis or rheumatism | 1.10 | 0.82,1.46 | 0.53 |
| Handgrip strength | 1.00 | 1.00,1.00 | 0.02* |
| Balance | 0.85 | 0.64,1.13 | 0.27 |
| Chair stand test | 0.93 | 0.81,1.08 | 0.34 |

**Notes:** The model was adjusted for variables including age, gender and other comorbidities. The analysis included data from participants with a BMI between 18.5 and 23.9 only. (n = 5733, events(diabetes) = 215). BMI, Body Mass Index; CI, confidence intervals; HR, Hazard Ratios; * P < 0.05.

# Table S10. Multivariable Cox regression analysis for diabetes in the overweight subgroup.

| Term | HR | 95%CI | *P*-value |
| --- | --- | --- | --- |
| Hip fractures | 0.27 | 0.04,1.91 | 0.19 |
| Age | 0.99 | 0.97,1.01 | 0.24 |
| Gender | 1.13 | 0.75,1.71 | 0.56 |
| History of falls | 1.10 | 0.75,1.61 | 0.64 |
| Smoke | 0.98 | 0.64,1.48 | 0.91 |
| Hypertension | 1.58 | 1.15,2.17 | 0.01* |
| Dyslipidemia | 1.34 | 0.87,2.06 | 0.19 |
| Asthma | 1.18 | 0.52,2.68 | 0.70 |
| Cancer or malignant tumor | 1.92 | 0.61,6.07 | 0.27 |
| Chronic lung diseases | 1.07 | 0.63,1.81 | 0.81 |
| Liver disease | 1.40 | 0.75,2.61 | 0.29 |
| Heart problems | 1.19 | 0.79,1.81 | 0.41 |
| Stroke | 0.93 | 0.34,2.54 | 0.89 |
| Kidney disease | 0.88 | 0.46,1.65 | 0.68 |
| Stomach or other digestive disease | 1.23 | 0.88,1.71 | 0.23 |
| Emotional nervous or psychiatric problems | 0.39 | 0.05,2.80 | 0.35 |
| Memory related disease | <0.01 | <0.01,NA | 0.99 |
| Arthritis or rheumatism | 1.04 | 0.76,1.42 | 0.81 |
| Handgrip strength | 1.00 | 0.99,1.01 | 0.95 |
| Balance | 0.96 | 0.71,1.31 | 0.82 |
| Chair stand test | 0.98 | 0.83,1.14 | 0.76 |

**Notes:** The model was adjusted for variables including age, gender and other comorbidities. The analysis included data from participants with a BMI between 24.0 and 27.9 only. (n = 2636, events(diabetes) = 189). BMI, Body Mass Index; CI, confidence intervals; HR, Hazard Ratios; * P < 0.05.

# Table S11. Multivariable Cox regression analysis for diabetes in the obesity subgroup.

| Term | HR | 95%CI | *P*-value |
| --- | --- | --- | --- |
| Hip fractures | 3.77 | 1.42,10.02 | 0.01* |
| Age | 0.99 | 0.97,1.01 | 0.47 |
| Gender | 1.15 | 0.65,2.03 | 0.64 |
| History of falls | 1.44 | 0.91,2.26 | 0.12 |
| Smoke | 1.74 | 1.04,2.90 | 0.03* |
| Hypertension | 1.03 | 0.71,1.51 | 0.87 |
| Dyslipidemia | 1.10 | 0.69,1.76 | 0.68 |
| Asthma | 0.80 | 0.27,2.41 | 0.70 |
| Cancer or malignant tumor | 4.43 | 1.52,12.88 | 0.01* |
| Chronic lung diseases | 1.07 | 0.56,2.03 | 0.83 |
| Liver disease | 1.76 | 0.80,3.89 | 0.16 |
| Heart problems | 1.61 | 1.01,2.55 | 0.04* |
| Stroke | 1.30 | 0.52,3.24 | 0.57 |
| Kidney disease | 1.45 | 0.73,2.89 | 0.29 |
| Stomach or other digestive disease | 0.79 | 0.49,1.30 | 0.36 |
| Emotional nervous or psychiatric problems | 0.78 | 0.10,5.95 | 0.81 |
| Memory related disease | 0.39 | 0.05,3.12 | 0.38 |
| Arthritis or rheumatism | 1.06 | 0.72,1.57 | 0.76 |
| Handgrip strength | 1.01 | 0.98,1.03 | 0.59 |
| Balance | 0.84 | 0.59,1.19 | 0.32 |
| Chair stand test | 0.89 | 0.73,1.07 | 0.20 |

**Notes:** The model was adjusted for variables including age, gender and other comorbidities. The analysis included data from participants with a BMI of 28.0 or higher only. (n = 1012, events(diabetes) = 121). BMI, Body Mass Index; CI, confidence intervals; HR, Hazard Ratios; * P < 0.05.

# Table S12. Schoenfeld residuals test for proportional hazards assumption in Cox model.

| Variable | Chi-square statistic | Degrees of freedom | *P*-value |
| --- | --- | --- | --- |
| Hip fractures | 2.10 | 1.00 | 0.15 |
| Age | 0.48 | 1.00 | 0.49 |
| Gender | 0.36 | 1.00 | 0.55 |
| BMI | 0.65 | 1.00 | 0.42 |
| History of falls | 0.10 | 1.00 | 0.75 |
| Smoke | 0.09 | 1.00 | 0.77 |
| Hypertension | 2.28 | 1.00 | 0.13 |
| Dyslipidemia | 0.77 | 1.00 | 0.38 |
| Asthma | 1.74 | 1.00 | 0.19 |
| Cancer or malignant tumor | 0.53 | 1.00 | 0.47 |
| Chronic lung diseases | 3.23 | 1.00 | 0.07 |
| Liver disease | 0.01 | 1.00 | 0.93 |
| Heart problems | 0.23 | 1.00 | 0.63 |
| Stroke | <0.01 | 1.00 | 0.96 |
| Kidney disease | 2.23 | 1.00 | 0.14 |
| Stomach or other digestive disease | 0.45 | 1.00 | 0.50 |
| Emotional nervous or psychiatric problems | <0.01 | 1.00 | 0.97 |
| Memory related disease | <0.01 | 1.00 | 0.95 |
| Arthritis or rheumatism | <0.01 | 1.00 | 0.97 |
| Handgrip strength | 2.43 | 1.00 | 0.12 |
| Balance | 0.11 | 1.00 | 0.74 |
| Chair stand test | 0.75 | 1.00 | 0.39 |
| Global | 17.72 | 22.00 | 0.72 |

# Table S13. Mediation analysis of Traditional herbal medicines, Tonic health supplements, depression and sleep duration in the male and obesity subgroups.

| Effect | Male Subgroup | |  | Obesity Subgroup | |
| --- | --- | --- | --- | --- | --- |
| Mediation  proportion (%) | *P*-value |  | Mediation  proportion (%) | *P-*value |
| Traditional herbal medicines | 0.01,  <0.01,0.15 | 0.48 |  | 0.04,  <0.01,0.28 | 0.40 |
| Tonic health supplements | 0.01,  <0.01,0.09 | 0.60 |  | <0.01,  <0.01,0.04 | 0.72 |
| Felt depression | 0.01,  <0.01,0.13 | 0.47 |  | 0.01,  <0.01,0.04 | 0.70 |
| Nap duration | <0.01,  <0.01,0.04 | 0.97 |  | <0.01,  <0.01,0.10 | 0.76 |
| Nighttime sleep duration | <0.01,  <0.01,0.09 | 0.92 |  | 0.01,  <0.01,0.46 | 0.84 |
| Total sleep duration | <0.01,  <0.01,0.12 | 0.94 |  | <0.01,  <0.01,0.08 | 0.84 |

# Table S14. SEM model fit test results in the male subgroup.

| Measure | Value |
| --- | --- |
| Chi-square statistic | 8720.19 |
| Degrees of freedom | 15.00 |
| *P*-value | <0.01* |
| Comparative fit index | <0.01* |
| Tucker-Lewis index | <0.01* |
| Root mean square error of approximation | 0.34 |
| Standardized Root Mean Square Residual | 0.11 |

# Table S15. SEM path coefficients and significance in the male subgroup.

| Left-Hand Side  Variable | Right-Hand  Side Variable | Estimate | Standard Error | Z-value | P-value | 95%CI | Standardized  Coefficient  (Latent Variable Scale) | Standardized  Coefficient  (All Variables) | Standardized Coefficient  (No Z Path） |
| --- | --- | --- | --- | --- | --- | --- | --- | --- | --- |
| Nap duration | Hip fractures | <0.01 | 0.14 | <0.01 | 0.99 | <0.01,0.28 | <0.01 | <0.01 | <0.01 |
| Nap duration | Age | 0.01 | <0.01 | 2.63 | 0.01* | <0.01,0.01 | 0.01 | 0.05 | 0.01 |
| Nap duration | BMI | 0.01 | <0.01 | 3.54 | <0.01* | 0.01,0.02 | 0.01 | 0.06 | 0.01 |
| Nap duration | History of falls | <0.01 | 0.05 | <0.01 | 0.13 | <0.01,0.02 | <0.01 | <0.01 | <0.01 |
| Nap duration | Smoke | 0.08 | 0.04 | 2.06 | 0.04* | <0.01,0.15 | 0.08 | 0.03 | 0.08 |
| Nap duration | Hypertension | 0.05 | 0.04 | 1.06 | 0.29 | <0.01,0.13 | 0.05 | 0.02 | 0.05 |
| Nap duration | Dyslipidemia | 0.24 | 0.07 | 3.49 | <0.01* | 0.10,0.37 | 0.24 | 0.06 | 0.24 |
| Nap duration | Asthma | <0.01 | 0.09 | <0.01 | 0.25 | <0.01,0.07 | <0.01 | <0.01 | <0.01 |
| Nap duration | Cancer or malignant tumor | 0.05 | 0.24 | 0.19 | 0.85 | <0.01,0.53 | 0.05 | <0.01 | 0.05 |
| Nap duration | Chronic lung diseases | 0.05 | 0.06 | 0.88 | 0.38 | <0.01,0.16 | 0.05 | 0.02 | 0.05 |
| Nap duration | Liver disease | <0.01 | 0.08 | <0.01 | 0.27 | <0.01,0.07 | <0.01 | <0.01 | <0.01 |
| Nap duration | Heart problems | 0.01 | 0.06 | 0.19 | 0.85 | <0.01,0.13 | 0.01 | <0.01 | 0.01 |
| Nap duration | Stroke | <0.01 | 0.13 | <0.01 | 0.41 | <0.01,0.15 | <0.01 | <0.01 | <0.01 |
| Nap duration | Kidney disease | <0.01 | 0.07 | <0.01 | 0.58 | <0.01,0.09 | <0.01 | <0.01 | <0.01 |
| Nap duration | Stomach or other digestive disease | 0.06 | 0.04 | 1.39 | 0.16 | <0.01,0.14 | 0.06 | 0.02 | 0.06 |
| Nap duration | Emotional nervous or psychiatric problems | <0.01 | 0.19 | <0.01 | 0.58 | <0.01,0.27 | <0.01 | <0.01 | <0.01 |
| Nap duration | Memory related disease | <0.01 | 0.16 | <0.01 | 0.35 | <0.01,0.16 | <0.01 | <0.01 | <0.01 |
| Nap duration | Arthritis or rheumatism | <0.01 | 0.04 | <0.01 | 0.07 | <0.01,0.01 | <0.01 | <0.01 | <0.01 |
| Nap duration | Handgrip strength | <0.01 | <0.01 | 1.67 | 0.10 | <0.01,<0.01 | <0.01 | 0.03 | <0.01 |
| Nap duration | Balance | <0.01 | 0.04 | 0.08 | 0.93 | <0.01,0.08 | <0.01 | <0.01 | <0.01 |
| Nap duration | Chair stand test | <0.01 | 0.02 | <0.01 | 0.68 | <0.01,0.03 | <0.01 | <0.01 | <0.01 |
| Nighttime sleep duration | Hip fractures | <0.01 | 0.13 | <0.01 | 0.16 | <0.01,0.07 | <0.01 | <0.01 | <0.01 |
| Nighttime sleep duration | Age | <0.01 | <0.01 | <0.01 | <0.01* | <0.01,<0.01 | <0.01 | <0.01 | <0.01 |
| Nighttime sleep duration | BMI | 0.01 | <0.01 | 2.77 | 0.01* | <0.01,0.02 | 0.01 | 0.04 | 0.01 |
| Nighttime sleep duration | History of falls | <0.01 | 0.05 | <0.01 | <0.01* | <0.01,<0.01 | <0.01 | <0.01 | <0.01 |
| Nighttime sleep duration | Smoke | <0.01 | 0.04 | <0.01 | 0.13 | <0.01,0.02 | <0.01 | <0.01 | <0.01 |
| Nighttime sleep duration | Hypertension | <0.01 | 0.04 | <0.01 | 0.71 | <0.01,0.07 | <0.01 | <0.01 | <0.01 |
| Nighttime sleep duration | Dyslipidemia | 0.11 | 0.06 | 1.80 | 0.07 | <0.01,0.24 | 0.11 | 0.03 | 0.11 |
| Nighttime sleep duration | Asthma | <0.01 | 0.09 | <0.01 | 0.02* | <0.01,<0.01 | <0.01 | <0.01 | <0.01 |
| Nighttime sleep duration | Cancer or malignant tumor | <0.01 | 0.21 | <0.01 | 0.13 | <0.01,0.09 | <0.01 | <0.01 | <0.01 |
| Nighttime sleep duration | Chronic lung diseases | 0.04 | 0.05 | 0.68 | 0.50 | <0.01,0.14 | 0.04 | 0.01 | 0.03 |
| Nighttime sleep duration | Liver disease | <0.01 | 0.09 | <0.01 | 0.13 | <0.01,0.04 | <0.01 | <0.01 | <0.01 |
| Nighttime sleep duration | Heart problems | <0.01 | 0.06 | <0.01 | 0.62 | <0.01,0.08 | <0.01 | <0.01 | <0.01 |
| Nighttime sleep duration | Stroke | <0.01 | 0.13 | <0.01 | 0.20 | <0.01,0.09 | <0.01 | <0.01 | <0.01 |
| Nighttime sleep duration | Kidney disease | <0.01 | 0.06 | <0.01 | 0.04* | <0.01,<0.01 | <0.01 | <0.01 | <0.01 |
| Nighttime sleep duration | Stomach or other digestive disease | <0.01 | 0.04 | <0.01 | <0.01* | <0.01,<0.01 | <0.01 | <0.01 | <0.01 |
| Nighttime sleep duration | Emotional nervous or psychiatric problems | <0.01 | 0.17 | <0.01 | 0.04* | <0.01,<0.01 | <0.01 | <0.01 | <0.01 |
| Nighttime sleep duration | Memory related disease | 0.13 | 0.14 | 0.98 | 0.33 | <0.01,0.40 | 0.13 | 0.01 | 0.13 |
| Nighttime sleep duration | Arthritis or rheumatism | <0.01 | 0.03 | <0.01 | <0.01* | <0.01,<0.01 | <0.01 | <0.01 | <0.01 |
| Nighttime sleep duration | Handgrip strength | <0.01 | <0.01 | 1.15 | 0.25 | <0.01,<0.01 | <0.01 | 0.02 | <0.01 |
| Nighttime sleep duration | Balance | 0.15 | 0.04 | 4.15 | <0.01* | 0.08,0.23 | 0.15 | 0.06 | 0.15 |
| Nighttime sleep duration | Chair stand test | <0.01 | 0.02 | <0.01 | 0.18 | <0.01,0.01 | <0.01 | <0.01 | <0.01 |
| Total sleep duration | Hip fractures | <0.01 | 0.13 | <0.01 | 0.06 | <0.01,0.01 | <0.01 | <0.01 | <0.01 |
| Total sleep duration | Age | <0.01 | <0.01 | <0.01 | <0.01* | <0.01,<0.01 | <0.01 | <0.01 | <0.01 |
| Total sleep duration | BMI | 0.01 | <0.01 | 2.44 | 0.01* | <0.01,0.02 | 0.01 | 0.04 | 0.01 |
| Total sleep duration | History of falls | <0.01 | 0.04 | <0.01 | <0.01* | <0.01,<0.01 | <0.01 | <0.01 | <0.01 |
| Total sleep duration | Smoke | <0.01 | 0.04 | <0.01 | 0.10 | <0.01,0.01 | <0.01 | <0.01 | <0.01 |
| Total sleep duration | Hypertension | <0.01 | 0.04 | <0.01 | 0.90 | <0.01,0.07 | <0.01 | <0.01 | <0.01 |
| Total sleep duration | Dyslipidemia | 0.09 | 0.06 | 1.44 | 0.15 | <0.01,0.21 | 0.09 | 0.02 | 0.09 |
| Total sleep duration | Asthma | <0.01 | 0.08 | <0.01 | 0.45 | <0.01,0.10 | <0.01 | <0.01 | <0.01 |
| Total sleep duration | Cancer or malignant tumor | <0.01 | 0.22 | <0.01 | 0.07 | <0.01,0.03 | <0.01 | <0.01 | <0.01 |
| Total sleep duration | Chronic lung diseases | <0.01 | 0.05 | <0.01 | 0.22 | <0.01,0.04 | <0.01 | <0.01 | <0.01 |
| Total sleep duration | Liver disease | <0.01 | 0.08 | <0.01 | 0.87 | <0.01,0.14 | <0.01 | <0.01 | <0.01 |
| Total sleep duration | Heart problems | <0.01 | 0.06 | 0.04 | 0.97 | <0.01,0.11 | <0.01 | <0.01 | <0.01 |
| Total sleep duration | Stroke | <0.01 | 0.13 | <0.01 | 0.18 | <0.01,0.08 | <0.01 | <0.01 | <0.01 |
| Total sleep duration | Kidney disease | <0.01 | 0.06 | <0.01 | 0.13 | <0.01,0.03 | <0.01 | <0.01 | <0.01 |
| Total sleep duration | Stomach or other digestive disease | <0.01 | 0.04 | <0.01 | 0.07 | <0.01,0.01 | <0.01 | <0.01 | <0.01 |
| Total sleep duration | Emotional nervous or psychiatric problems | <0.01 | 0.17 | <0.01 | 0.37 | <0.01,0.18 | <0.01 | <0.01 | <0.01 |
| Total sleep duration | Memory related disease | <0.01 | 0.14 | <0.01 | 0.86 | <0.01,0.24 | <0.01 | <0.01 | <0.01 |
| Total sleep duration | Arthritis or rheumatism | <0.01 | 0.03 | <0.01 | 0.01* | <0.01,<0.01 | <0.01 | <0.01 | <0.01 |
| Total sleep duration | Handgrip strength | <0.01 | <0.01 | 0.10 | 0.92 | <0.01,<0.01 | <0.01 | <0.01 | <0.01 |
| Total sleep duration | Balance | 0.17 | 0.04 | 4.56 | <0.01* | 0.09,0.24 | 0.17 | 0.07 | 0.16 |
| Total sleep duration | Chair stand test | <0.01 | 0.02 | <0.01 | 0.53 | <0.01,0.03 | <0.01 | <0.01 | <0.01 |
| Felt depressed | Hip fractures | 0.34 | 0.14 | 2.52 | 0.01* | 0.08,0.61 | 0.34 | 0.04 | 0.33 |
| Felt depressed | Age | <0.01 | <0.01 | <0.01 | 0.81 | <0.01,<0.01 | <0.01 | <0.01 | <0.01 |
| Felt depressed | BMI | <0.01 | <0.01 | <0.01 | <0.01* | <0.01,<0.01 | <0.01 | <0.01 | <0.01 |
| Felt depressed | History of falls | 0.24 | 0.05 | 5.27 | <0.01* | 0.15,0.33 | 0.24 | 0.08 | 0.23 |
| Felt depressed | Smoke | 0.04 | 0.04 | 1.05 | 0.29 | <0.01,0.12 | 0.04 | 0.02 | 0.04 |
| Felt depressed | Hypertension | 0.08 | 0.04 | 1.86 | 0.06 | <0.01,0.16 | 0.08 | 0.03 | 0.08 |
| Felt depressed | Dyslipidemia | <0.01 | 0.07 | <0.01 | 0.21 | <0.01,0.05 | <0.01 | <0.01 | <0.01 |
| Felt depressed | Asthma | 0.24 | 0.09 | 2.67 | 0.01* | 0.06,0.41 | 0.24 | 0.04 | 0.23 |
| Felt depressed | Cancer or malignant tumor | 0.45 | 0.21 | 2.17 | 0.03* | 0.04,0.86 | 0.45 | 0.03 | 0.43 |
| Felt depressed | Chronic lung diseases | 0.18 | 0.06 | 3.31 | <0.01* | 0.07,0.29 | 0.18 | 0.05 | 0.18 |
| Felt depressed | Liver disease | 0.17 | 0.08 | 2.03 | 0.04* | 0.01,0.33 | 0.17 | 0.03 | 0.16 |
| Felt depressed | Heart problems | 0.19 | 0.06 | 3.04 | <0.01* | 0.07,0.31 | 0.19 | 0.05 | 0.18 |
| Felt depressed | Stroke | 0.15 | 0.12 | 1.21 | 0.22 | <0.01,0.40 | 0.15 | 0.02 | 0.14 |
| Felt depressed | Kidney disease | 0.17 | 0.06 | 2.72 | 0.01* | 0.05,0.30 | 0.17 | 0.04 | 0.16 |
| Felt depressed | Stomach or other digestive disease | 0.23 | 0.04 | 5.73 | <0.01* | 0.15,0.31 | 0.23 | 0.09 | 0.22 |
| Felt depressed | Emotional nervous or psychiatric problems | 0.40 | 0.16 | 2.55 | 0.01* | 0.09,0.71 | 0.40 | 0.03 | 0.39 |
| Felt depressed | Memory related disease | 0.01 | 0.16 | 0.03 | 0.97 | <0.01,0.31 | 0.01 | <0.01 | <0.01 |
| Felt depressed | Arthritis or rheumatism | 0.26 | 0.04 | 7.03 | <0.01* | 0.18,0.33 | 0.26 | 0.11 | 0.25 |
| Felt depressed | Handgrip strength | <0.01 | <0.01 | 0.17 | 0.87 | <0.01,<0.01 | <0.01 | <0.01 | <0.01 |
| Felt depressed | Balance | <0.01 | 0.04 | <0.01 | <0.01* | <0.01,<0.01 | <0.01 | <0.01 | <0.01 |
| Felt depressed | Chair stand test | <0.01 | 0.02 | <0.01 | <0.01* | <0.01,<0.01 | <0.01 | <0.01 | <0.01 |
| Treat yourself by tonic health supplements | Hip fractures | 0.03 | 0.02 | 1.92 | 0.05 | <0.01,0.06 | 0.03 | 0.02 | 0.17 |
| Treat yourself by tonic health supplements | Age | <0.01 | <0.01 | 3.33 | <0.01* | <0.01,<0.01 | <0.01 | 0.05 | 0.01 |
| Treat yourself by tonic health supplements | BMI | <0.01 | <0.01 | 0.98 | 0.33 | <0.01,<0.01 | <0.01 | 0.01 | <0.01 |
| Treat yourself by tonic health supplements | History of falls | <0.01 | 0.01 | 0.42 | 0.67 | <0.01,0.02 | <0.01 | 0.01 | 0.02 |
| Treat yourself by tonic health supplements | Smoke | <0.01 | 0.01 | <0.01 | 0.65 | <0.01,0.01 | <0.01 | <0.01 | <0.01 |
| Treat yourself by tonic health supplements | Hypertension | 0.01 | 0.01 | 1.14 | 0.25 | <0.01,0.02 | 0.01 | 0.02 | 0.04 |
| Treat yourself by tonic health supplements | Dyslipidemia | 0.04 | 0.01 | 5.11 | <0.01* | 0.02,0.05 | 0.04 | 0.06 | 0.24 |
| Treat yourself by tonic health supplements | Asthma | 0.02 | 0.01 | 2.00 | 0.05 | <0.01,0.04 | 0.02 | 0.02 | 0.13 |
| Treat yourself by tonic health supplements | Cancer or malignant tumor | <0.01 | 0.35 | <0.01 | 0.93 | <0.01,0.65 | <0.01 | <0.01 | <0.01 |
| Treat yourself by tonic health supplements | Chronic lung diseases | <0.01 | 0.01 | 0.07 | 0.95 | <0.01,0.02 | <0.01 | <0.01 | <0.01 |
| Treat yourself by tonic health supplements | Liver disease | 0.03 | 0.01 | 3.22 | <0.01* | 0.01,0.05 | 0.03 | 0.04 | 0.18 |
| Treat yourself by tonic health supplements | Heart problems | <0.01 | 0.01 | <0.01 | 0.95 | <0.01,0.02 | <0.01 | <0.01 | <0.01 |
| Treat yourself by tonic health supplements | Stroke | 0.06 | 0.01 | 5.20 | <0.01* | 0.04,0.08 | 0.06 | 0.05 | 0.36 |
| Treat yourself by tonic health supplements | Kidney disease | <0.01 | 0.01 | <0.01 | 0.41 | <0.01,0.01 | <0.01 | <0.01 | <0.01 |
| Treat yourself by tonic health supplements | Stomach or other digestive disease | <0.01 | 0.01 | 0.10 | 0.92 | <0.01,0.01 | <0.01 | <0.01 | <0.01 |
| Treat yourself by tonic health supplements | Emotional nervous or psychiatric problems | <0.01 | 0.03 | <0.01 | 0.63 | <0.01,0.04 | <0.01 | <0.01 | <0.01 |
| Treat yourself by tonic health supplements | Memory related disease | 0.06 | 0.02 | 3.71 | <0.01* | 0.03,0.09 | 0.06 | 0.04 | 0.34 |
| Treat yourself by tonic health supplements | Arthritis or rheumatism | 0.01 | 0.01 | 1.13 | 0.26 | <0.01,0.02 | 0.01 | 0.02 | 0.04 |
| Treat yourself by tonic health supplements | Handgrip strength | <0.01 | <0.01 | <0.01 | 0.81 | <0.01,<0.01 | <0.01 | <0.01 | <0.01 |
| Treat yourself by tonic health supplements | Balance | 0.01 | 0.01 | 1.63 | 0.10 | <0.01,0.02 | 0.01 | 0.03 | 0.07 |
| Treat yourself by tonic health supplements | Chair stand test | <0.01 | <0.01 | 0.10 | 0.92 | <0.01,0.01 | <0.01 | <0.01 | <0.01 |
| Treat yourself by consumed traditional herbal medicines | Hip fractures | 0.06 | 0.02 | 2.95 | <0.01* | 0.02,0.10 | 0.06 | 0.03 | 0.25 |
| Treat yourself by consumed traditional herbal medicines | Age | <0.01 | <0.01 | 0.07 | 0.95 | <0.01,<0.01 | <0.01 | <0.01 | <0.01 |
| Treat yourself by consumed traditional herbal medicines | BMI | <0.01 | <0.01 | 1.69 | 0.09 | <0.01,<0.01 | <0.01 | 0.03 | 0.01 |
| Treat yourself by consumed traditional herbal medicines | History of falls | 0.02 | 0.01 | 2.15 | 0.03* | <0.01,0.03 | 0.02 | 0.03 | 0.08 |
| Treat yourself by consumed traditional herbal medicines | Smoke | <0.01 | 0.01 | <0.01 | 0.89 | <0.01,0.01 | <0.01 | <0.01 | <0.01 |
| Treat yourself by consumed traditional herbal medicines | Hypertension | <0.01 | 0.01 | 0.55 | 0.58 | <0.01,0.02 | <0.01 | 0.01 | 0.02 |
| Treat yourself by consumed traditional herbal medicines | Dyslipidemia | 0.03 | 0.01 | 2.81 | <0.01* | 0.01,0.05 | 0.03 | 0.03 | 0.13 |
| Treat yourself by consumed traditional herbal medicines | Asthma | <0.01 | 0.02 | 0.05 | 0.96 | <0.01,0.03 | <0.01 | <0.01 | <0.01 |
| Treat yourself by consumed traditional herbal medicines | Cancer or malignant tumor | 0.08 | 0.04 | 2.38 | 0.02* | 0.01,0.15 | 0.08 | 0.02 | 0.37 |
| Treat yourself by consumed traditional herbal medicines | Chronic lung diseases | 0.02 | 0.01 | 2.02 | 0.04* | <0.01,0.04 | 0.02 | 0.03 | 0.09 |
| Treat yourself by consumed traditional herbal medicines | Liver disease | 0.04 | 0.01 | 3.00 | <0.01* | 0.01,0.06 | 0.04 | 0.03 | 0.16 |
| Treat yourself by consumed traditional herbal medicines | Heart problems | 0.04 | 0.01 | 4.14 | <0.01* | 0.02,0.06 | 0.04 | 0.05 | 0.17 |
| Treat yourself by consumed traditional herbal medicines | Stroke | 0.10 | 0.02 | 5.75 | <0.01* | 0.07,0.14 | 0.10 | 0.06 | 0.44 |
| Treat yourself by consumed traditional herbal medicines | Kidney disease | 0.06 | 0.01 | 5.81 | <0.01* | 0.04,0.08 | 0.06 | 0.06 | 0.26 |
| Treat yourself by consumed traditional herbal medicines | Stomach or other digestive disease | 0.03 | 0.01 | 3.93 | <0.01* | 0.01,0.04 | 0.03 | 0.05 | 0.12 |
| Treat yourself by consumed traditional herbal medicines | Emotional nervous or psychiatric problems | 0.02 | 0.03 | 0.60 | 0.55 | <0.01,0.09 | 0.02 | 0.01 | 0.09 |
| Treat yourself by consumed traditional herbal medicines | Memory related disease | 0.01 | 0.03 | 0.20 | 0.84 | <0.01,0.06 | 0.01 | <0.01 | 0.02 |
| Treat yourself by consumed traditional herbal medicines | Arthritis or rheumatism | 0.03 | 0.01 | 4.65 | <0.01* | 0.02,0.05 | 0.03 | 0.07 | 0.14 |
| Treat yourself by consumed traditional herbal medicines | Handgrip strength | <0.01 | <0.01 | 0.27 | 0.78 | <0.01,<0.01 | <0.01 | <0.01 | <0.01 |
| Treat yourself by consumed traditional herbal medicines | Balance | <0.01 | 0.01 | <0.01 | 0.61 | <0.01,0.01 | <0.01 | <0.01 | <0.01 |
| Treat yourself by consumed traditional herbal medicines | Chair stand test | <0.01 | <0.01 | <0.01 | <0.01* | <0.01,<0.01 | <0.01 | <0.01 | <0.01 |
| Diabetes | Hip fractures | 0.07 | 0.02 | 3.47 | <0.01* | 0.03,0.10 | 0.07 | 0.04 | 0.31 |
| Diabetes | Age | <0.01 | <0.01 | <0.01 | 0.28 | <0.01,<0.01 | <0.01 | <0.01 | <0.01 |
| Diabetes | BMI | <0.01 | <0.01 | 6.03 | <0.01* | <0.01,0.01 | <0.01 | 0.09 | 0.02 |
| Diabetes | History of falls | <0.01 | 0.01 | <0.01 | 0.56 | <0.01,0.01 | <0.01 | <0.01 | <0.01 |
| Diabetes | Smoke | <0.01 | 0.01 | 0.13 | 0.90 | <0.01,0.01 | <0.01 | <0.01 | <0.01 |
| Diabetes | Hypertension | 0.02 | 0.01 | 2.56 | 0.01* | <0.01,0.03 | 0.02 | 0.03 | 0.09 |
| Diabetes | Dyslipidemia | 0.01 | 0.01 | 0.61 | 0.54 | <0.01,0.03 | 0.01 | 0.01 | 0.03 |
| Diabetes | Asthma | <0.01 | 0.02 | <0.01 | 0.94 | <0.01,0.03 | <0.01 | <0.01 | <0.01 |
| Diabetes | Cancer or malignant tumor | 0.04 | 0.04 | 1.02 | 0.31 | <0.01,0.13 | 0.04 | 0.01 | 0.21 |
| Diabetes | Chronic lung diseases | <0.01 | 0.01 | <0.01 | 0.51 | <0.01,0.01 | <0.01 | <0.01 | <0.01 |
| Diabetes | Liver disease | 0.02 | 0.01 | 1.65 | 0.10 | <0.01,0.05 | 0.02 | 0.02 | 0.11 |
| Diabetes | Heart problems | 0.03 | 0.01 | 3.24 | <0.01* | 0.01,0.05 | 0.03 | 0.04 | 0.15 |
| Diabetes | Stroke | 0.01 | 0.02 | 0.74 | 0.46 | <0.01,0.05 | 0.01 | 0.01 | 0.07 |
| Diabetes | Kidney disease | <0.01 | 0.01 | <0.01 | 0.76 | <0.01,0.02 | <0.01 | <0.01 | <0.01 |
| Diabetes | Stomach or other digestive disease | <0.01 | 0.01 | 0.4 | 0.69 | <0.01,0.02 | <0.01 | 0.01 | 0.02 |
| Diabetes | Emotional nervous or psychiatric problems | <0.01 | 0.05 | <0.01 | 0.72 | <0.01,0.07 | <0.01 | <0.01 | <0.01 |
| Diabetes | Memory related disease | <0.01 | 0.04 | <0.01 | 0.29 | <0.01,0.04 | <0.01 | <0.01 | <0.01 |
| Diabetes | Arthritis or rheumatism | <0.01 | 0.01 | <0.01 | 0.80 | <0.01,0.01 | <0.01 | <0.01 | <0.01 |
| Diabetes | Handgrip strength | <0.01 | <0.01 | <0.01 | 0.97 | <0.01,<0.01 | <0.01 | <0.01 | <0.01 |
| Diabetes | Balance | <0.01 | 0.01 | 0.41 | 0.69 | <0.01,0.02 | <0.01 | 0.01 | 0.02 |
| Diabetes | Chair stand test | <0.01 | <0.01 | <0.01 | 0.54 | <0.01,0.01 | <0.01 | <0.01 | <0.01 |
| Diabetes | Nap duration | <0.01 | <0.01 | 0.42 | 0.67 | <0.01,0.01 | <0.01 | 0.01 | 0.01 |
| Diabetes | Nighttime sleep duration | <0.01 | <0.01 | <0.01 | 0.75 | <0.01,0.01 | <0.01 | <0.01 | <0.01 |
| Diabetes | Total sleep duration | <0.01 | <0.01 | 0.1 | 0.92 | <0.01,0.01 | <0.01 | <0.01 | <0.01 |
| Diabetes | Felt depressed | <0.01 | <0.01 | 0.73 | 0.47 | <0.01,0.01 | <0.01 | 0.01 | 0.01 |
| Diabetes | Treat yourself by tonic health supplements | 0.02 | 0.01 | 1.96 | 0.05 | <0.01,0.05 | 0.02 | 0.02 | 0.02 |
| Diabetes | Treat yourself by consumed traditional herbal medicines | 0.02 | 0.01 | 1.52 | 0.13 | <0.01,0.04 | 0.02 | 0.02 | 0.02 |

# Table S16. SEM model fit test results in the obesity subgroup.

| Measure | Value |
| --- | --- |
| Chi-square statistic | 39.38 |
| Degrees of freedom | <0.01 |
| *P*-value | 0.99 |
| Comparative fit index | 0.97 |
| Tucker-Lewis index | 0.06 |
| Root mean square error of approximation | 0.03 |

# Table S17. SEM path coefficients and significance in the obesity subgroup.

| Left-hand side variable | Right-hand side variable | Estimate | Standard error | Z-value | P-value | 95%CI | Standardized  Coefficient  (Latent Variable Scale) | Standardized  Coefficient  (All Variables) | Standardized Coefficient  (No Z Path） |
| --- | --- | --- | --- | --- | --- | --- | --- | --- | --- |
| Nap duration | Hip fractures | 0.19 | 0.34 | 0.56 | 0.58 | <0.01,0.86 | 0.19 | 0.02 | 0.18 |
| Nap duration | Age | 0.01 | <0.01 | 3.01 | <0.01* | <0.01,0.02 | 0.01 | 0.11 | 0.01 |
| Nap duration | Gender | <0.01 | 0.12 | <0.01 | <0.01* | <0.01,<0.01 | <0.01 | <0.01 | <0.01 |
| Nap duration | History of falls | <0.01 | 0.10 | <0.01 | 0.40 | <0.01,0.11 | <0.01 | <0.01 | <0.01 |
| Nap duration | Smoke | <0.01 | 0.11 | <0.01 | 0.28 | <0.01,0.09 | <0.01 | <0.01 | <0.01 |
| Nap duration | Hypertension | <0.01 | 0.07 | <0.01 | 0.68 | <0.01,0.12 | <0.01 | <0.01 | <0.01 |
| Nap duration | Dyslipidemia | 0.02 | 0.10 | 0.22 | 0.82 | <0.01,0.22 | 0.02 | 0.01 | 0.02 |
| Nap duration | Asthma | 0.12 | 0.20 | 0.59 | 0.56 | <0.01,0.50 | 0.12 | 0.02 | 0.11 |
| Nap duration | Cancer or malignant tumor | 0.59 | 0.32 | 1.83 | 0.07 | <0.01,1.22 | 0.59 | 0.06 | 0.57 |
| Nap duration | Chronic lung diseases | 0.04 | 0.14 | 0.32 | 0.75 | <0.01,0.31 | 0.04 | 0.01 | 0.04 |
| Nap duration | Liver disease | <0.01 | 0.20 | <0.01 | 0.28 | <0.01,0.18 | <0.01 | <0.01 | <0.01 |
| Nap duration | Heart problems | 0.15 | 0.11 | 1.39 | 0.16 | <0.01,0.36 | 0.15 | 0.05 | 0.14 |
| Nap duration | Stroke | 0.26 | 0.24 | 1.11 | 0.27 | <0.01,0.73 | 0.26 | 0.04 | 0.25 |
| Nap duration | Kidney disease | <0.01 | 0.20 | <0.01 | 0.16 | <0.01,0.11 | <0.01 | <0.01 | <0.01 |
| Nap duration | Stomach or other digestive disease | <0.01 | 0.10 | <0.01 | 0.28 | <0.01,0.09 | <0.01 | <0.01 | <0.01 |
| Nap duration | Emotional nervous or psychiatric problems | 0.63 | 0.41 | 1.52 | 0.13 | <0.01,1.44 | 0.63 | 0.06 | 0.61 |
| Nap duration | Memory related disease | <0.01 | 0.27 | <0.01 | 0.14 | <0.01,0.13 | <0.01 | <0.01 | <0.01 |
| Nap duration | Arthritis or rheumatism | <0.01 | 0.08 | <0.01 | 0.64 | <0.01,0.12 | <0.01 | <0.01 | <0.01 |
| Nap duration | Handgrip strength | <0.01 | <0.01 | <0.01 | 0.21 | <0.01,<0.01 | <0.01 | <0.01 | <0.01 |
| Nap duration | Balance | <0.01 | 0.07 | <0.01 | 0.99 | <0.01,0.15 | <0.01 | <0.01 | <0.01 |
| Nap duration | Chair stand test | 0.05 | 0.04 | 1.35 | 0.18 | <0.01,0.13 | 0.05 | 0.05 | 0.05 |
| Nighttime sleep duration | Hip fractures | <0.01 | 0.35 | <0.01 | 0.58 | <0.01,0.49 | <0.01 | <0.01 | <0.01 |
| Nighttime sleep duration | Age | <0.01 | <0.01 | <0.01 | 0.22 | <0.01,<0.01 | <0.01 | <0.01 | <0.01 |
| Nighttime sleep duration | Gender | <0.01 | 0.11 | <0.01 | 0.37 | <0.01,0.12 | <0.01 | <0.01 | <0.01 |
| Nighttime sleep duration | History of falls | <0.01 | 0.10 | <0.01 | 0.01* | <0.01,<0.01 | <0.01 | <0.01 | <0.01 |
| Nighttime sleep duration | Smoke | <0.01 | 0.11 | <0.01 | 0.69 | <0.01,0.17 | <0.01 | <0.01 | <0.01 |
| Nighttime sleep duration | Hypertension | 0.04 | 0.07 | 0.53 | 0.60 | <0.01,0.18 | 0.04 | 0.02 | 0.04 |
| Nighttime sleep duration | Dyslipidemia | 0.06 | 0.10 | 0.63 | 0.53 | <0.01,0.25 | 0.06 | 0.02 | 0.06 |
| Nighttime sleep duration | Asthma | <0.01 | 0.21 | <0.01 | 0.92 | <0.01,0.40 | <0.01 | <0.01 | <0.01 |
| Nighttime sleep duration | Cancer or malignant tumor | <0.01 | 0.42 | <0.01 | 0.38 | <0.01,0.46 | <0.01 | <0.01 | <0.01 |
| Nighttime sleep duration | Chronic lung diseases | <0.01 | 0.13 | <0.01 | 0.26 | <0.01,0.11 | <0.01 | <0.01 | <0.01 |
| Nighttime sleep duration | Liver disease | <0.01 | 0.20 | <0.01 | 0.43 | <0.01,0.24 | <0.01 | <0.01 | <0.01 |
| Nighttime sleep duration | Heart problems | <0.01 | 0.10 | 0.01 | 1.00 | <0.01,0.20 | <0.01 | <0.01 | <0.01 |
| Nighttime sleep duration | Stroke | 0.04 | 0.22 | 0.16 | 0.87 | <0.01,0.46 | 0.04 | 0.01 | 0.03 |
| Nighttime sleep duration | Kidney disease | <0.01 | 0.17 | <0.01 | 0.13 | <0.01,0.08 | <0.01 | <0.01 | <0.01 |
| Nighttime sleep duration | Stomach or other digestive disease | <0.01 | 0.09 | <0.01 | 0.17 | <0.01,0.05 | <0.01 | <0.01 | <0.01 |
| Nighttime sleep duration | Emotional nervous or psychiatric problems | <0.01 | 0.40 | <0.01 | 0.12 | <0.01,0.16 | <0.01 | <0.01 | <0.01 |
| Nighttime sleep duration | Memory related disease | 0.35 | 0.35 | 1.00 | 0.32 | <0.01,1.04 | 0.35 | 0.04 | 0.34 |
| Nighttime sleep duration | Arthritis or rheumatism | <0.01 | 0.07 | <0.01 | <0.01* | <0.01,<0.01 | <0.01 | <0.01 | <0.01 |
| Nighttime sleep duration | Handgrip strength | <0.01 | <0.01 | 0.56 | 0.58 | <0.01,0.01 | <0.01 | 0.03 | <0.01 |
| Nighttime sleep duration | Balance | 0.01 | 0.07 | 0.10 | 0.92 | <0.01,0.14 | 0.01 | <0.01 | 0.01 |
| Nighttime sleep duration | Chair stand test | 0.05 | 0.04 | 1.48 | 0.14 | <0.01,0.12 | 0.05 | 0.05 | 0.05 |
| Total sleep duration | Hip fractures | <0.01 | 0.33 | <0.01 | 0.66 | <0.01,0.50 | <0.01 | <0.01 | <0.01 |
| Total sleep duration | Age | <0.01 | <0.01 | <0.01 | 0.67 | <0.01,0.01 | <0.01 | <0.01 | <0.01 |
| Total sleep duration | Gender | <0.01 | 0.11 | <0.01 | 0.76 | <0.01,0.19 | <0.01 | <0.01 | <0.01 |
| Total sleep duration | History of falls | <0.01 | 0.10 | <0.01 | 0.06 | <0.01,0.01 | <0.01 | <0.01 | <0.01 |
| Total sleep duration | Smoke | <0.01 | 0.11 | <0.01 | 0.95 | <0.01,0.20 | <0.01 | <0.01 | <0.01 |
| Total sleep duration | Hypertension | <0.01 | 0.07 | <0.01 | 0.71 | <0.01,0.12 | <0.01 | <0.01 | <0.01 |
| Total sleep duration | Dyslipidemia | <0.01 | 0.10 | <0.01 | 0.80 | <0.01,0.16 | <0.01 | <0.01 | <0.01 |
| Total sleep duration | Asthma | <0.01 | 0.22 | <0.01 | 0.89 | <0.01,0.40 | <0.01 | <0.01 | <0.01 |
| Total sleep duration | Cancer or malignant tumor | <0.01 | 0.35 | <0.01 | 0.44 | <0.01,0.41 | <0.01 | <0.01 | <0.01 |
| Total sleep duration | Chronic lung diseases | <0.01 | 0.13 | <0.01 | 0.07 | <0.01,0.02 | <0.01 | <0.01 | <0.01 |
| Total sleep duration | Liver disease | <0.01 | 0.18 | <0.01 | 0.76 | <0.01,0.30 | <0.01 | <0.01 | <0.01 |
| Total sleep duration | Heart problems | 0.09 | 0.10 | 0.90 | 0.37 | <0.01,0.29 | 0.09 | 0.03 | 0.09 |
| Total sleep duration | Stroke | <0.01 | 0.20 | <0.01 | 0.76 | <0.01,0.34 | <0.01 | <0.01 | <0.01 |
| Total sleep duration | Kidney disease | <0.01 | 0.16 | <0.01 | 0.09 | <0.01,0.04 | <0.01 | <0.01 | <0.01 |
| Total sleep duration | Stomach or other digestive disease | <0.01 | 0.09 | <0.01 | 0.57 | <0.01,0.12 | <0.01 | <0.01 | <0.01 |
| Total sleep duration | Emotional nervous or psychiatric problems | <0.01 | 0.40 | <0.01 | 0.40 | <0.01,0.45 | <0.01 | <0.01 | <0.01 |
| Total sleep duration | Memory related disease | 0.22 | 0.34 | 0.64 | 0.52 | <0.01,0.89 | 0.22 | 0.02 | 0.22 |
| Total sleep duration | Arthritis or rheumatism | <0.01 | 0.07 | <0.01 | 0.05 | <0.01,<0.01 | <0.01 | <0.01 | <0.01 |
| Total sleep duration | Handgrip strength | <0.01 | <0.01 | 0.80 | 0.42 | <0.01,0.01 | <0.01 | 0.04 | <0.01 |
| Total sleep duration | Balance | 0.01 | 0.07 | 0.11 | 0.91 | <0.01,0.14 | 0.01 | <0.01 | 0.01 |
| Total sleep duration | Chair stand test | 0.07 | 0.04 | 1.88 | 0.06 | <0.01,0.14 | 0.07 | 0.07 | 0.07 |
| Felt depressed | Hip fractures | 0.29 | 0.40 | 0.73 | 0.47 | <0.01,1.07 | 0.29 | 0.03 | 0.27 |
| Felt depressed | Age | <0.01 | <0.01 | <0.01 | 0.19 | <0.01,<0.01 | <0.01 | <0.01 | <0.01 |
| Felt depressed | Gender | 0.12 | 0.12 | 1.03 | 0.31 | <0.01,0.36 | 0.12 | 0.06 | 0.12 |
| Felt depressed | History of falls | 0.26 | 0.10 | 2.74 | 0.01* | 0.07,0.45 | 0.26 | 0.09 | 0.25 |
| Felt depressed | Smoke | <0.01 | 0.11 | <0.01 | 0.70 | <0.01,0.17 | <0.01 | <0.01 | <0.01 |
| Felt depressed | Hypertension | 0.09 | 0.08 | 1.16 | 0.25 | <0.01,0.24 | 0.09 | 0.04 | 0.08 |
| Felt depressed | Dyslipidemia | 0.06 | 0.10 | 0.64 | 0.52 | <0.01,0.26 | 0.06 | 0.02 | 0.06 |
| Felt depressed | Asthma | <0.01 | 0.21 | 0.02 | 0.98 | <0.01,0.41 | <0.01 | <0.01 | <0.01 |
| Felt depressed | Cancer or malignant tumor | 0.56 | 0.32 | 1.73 | 0.08 | <0.01,1.19 | 0.56 | 0.05 | 0.52 |
| Felt depressed | Chronic lung diseases | 0.01 | 0.14 | 0.07 | 0.95 | <0.01,0.28 | 0.01 | <0.01 | 0.01 |
| Felt depressed | Liver disease | 0.29 | 0.20 | 1.42 | 0.16 | <0.01,0.68 | 0.29 | 0.05 | 0.27 |
| Felt depressed | Heart problems | 0.05 | 0.10 | 0.51 | 0.61 | <0.01,0.25 | 0.05 | 0.02 | 0.05 |
| Felt depressed | Stroke | <0.01 | 0.23 | <0.01 | 0.89 | <0.01,0.42 | <0.01 | <0.01 | <0.01 |
| Felt depressed | Kidney disease | 0.18 | 0.19 | 0.96 | 0.34 | <0.01,0.56 | 0.18 | 0.04 | 0.17 |
| Felt depressed | Stomach or other digestive disease | 0.29 | 0.10 | 3.04 | <0.01* | 0.10,0.48 | 0.29 | 0.11 | 0.27 |
| Felt depressed | Emotional nervous or psychiatric problems | 0.44 | 0.26 | 1.68 | 0.09 | <0.01,0.96 | 0.44 | 0.04 | 0.41 |
| Felt depressed | Memory related disease | 0.34 | 0.49 | 0.70 | 0.48 | <0.01,1.31 | 0.34 | 0.03 | 0.32 |
| Felt depressed | Arthritis or rheumatism | 0.33 | 0.08 | 4.29 | <0.01* | 0.18,0.48 | 0.33 | 0.15 | 0.31 |
| Felt depressed | Handgrip strength | <0.01 | <0.01 | <0.01 | 0.13 | <0.01,<0.01 | <0.01 | <0.01 | <0.01 |
| Felt depressed | Balance | <0.01 | 0.08 | <0.01 | 0.06 | <0.01,0.01 | <0.01 | <0.01 | <0.01 |
| Felt depressed | Chair stand test | <0.01 | 0.04 | <0.01 | 0.06 | <0.01,<0.01 | <0.01 | <0.01 | <0.01 |
| Treat yourself by tonic health supplements | Hip fractures | 0.14 | 0.05 | 2.76 | 0.01* | 0.04,0.23 | 0.14 | 0.07 | 0.65 |
| Treat yourself by tonic health supplements | Age | <0.01 | <0.01 | 2.49 | 0.01* | <0.01,<0.01 | <0.01 | 0.09 | 0.01 |
| Treat yourself by tonic health supplements | Gender | 0.01 | 0.02 | 0.51 | 0.61 | <0.01,0.06 | 0.01 | 0.03 | 0.06 |
| Treat yourself by tonic health supplements | History of falls | <0.01 | 0.02 | <0.01 | 0.95 | <0.01,0.04 | <0.01 | <0.01 | <0.01 |
| Treat yourself by tonic health supplements | Smoke | <0.01 | 0.02 | <0.01 | 0.69 | <0.01,0.03 | <0.01 | <0.01 | <0.01 |
| Treat yourself by tonic health supplements | Hypertension | <0.01 | 0.02 | <0.01 | 0.56 | <0.01,0.02 | <0.01 | <0.01 | <0.01 |
| Treat yourself by tonic health supplements | Dyslipidemia | 0.03 | 0.02 | 1.72 | 0.09 | <0.01,0.07 | 0.03 | 0.06 | 0.16 |
| Treat yourself by tonic health supplements | Asthma | 0.03 | 0.05 | 0.54 | 0.59 | <0.01,0.13 | 0.03 | 0.02 | 0.13 |
| Treat yourself by tonic health supplements | Cancer or malignant tumor | <0.01 | 0.18 | <0.01 | 0.73 | <0.01,0.29 | <0.01 | <0.01 | <0.01 |
| Treat yourself by tonic health supplements | Chronic lung diseases | <0.01 | 0.04 | <0.01 | 0.74 | <0.01,0.06 | <0.01 | <0.01 | <0.01 |
| Treat yourself by tonic health supplements | Liver disease | <0.01 | 0.03 | 0.01 | 0.99 | <0.01,0.07 | <0.01 | <0.01 | <0.01 |
| Treat yourself by tonic health supplements | Heart problems | 0.05 | 0.02 | 2.57 | 0.01* | 0.01,0.08 | 0.05 | 0.08 | 0.22 |
| Treat yourself by tonic health supplements | Stroke | 0.04 | 0.04 | 0.87 | 0.39 | <0.01,0.12 | 0.04 | 0.03 | 0.17 |
| Treat yourself by tonic health supplements | Kidney disease | <0.01 | 0.05 | <0.01 | 0.76 | <0.01,0.08 | <0.01 | <0.01 | <0.01 |
| Treat yourself by tonic health supplements | Stomach or other digestive disease | <0.01 | 0.02 | <0.01 | 0.51 | <0.01,0.03 | <0.01 | <0.01 | <0.01 |
| Treat yourself by tonic health supplements | Emotional nervous or psychiatric problems | 0.03 | 0.10 | 0.32 | 0.75 | <0.01,0.23 | 0.03 | 0.01 | 0.15 |
| Treat yourself by tonic health supplements | Memory related disease | 0.19 | 0.04 | 4.23 | <0.01* | 0.10,0.27 | 0.19 | 0.10 | 0.89 |
| Treat yourself by tonic health supplements | Arthritis or rheumatism | <0.01 | 0.02 | 0.19 | 0.85 | <0.01,0.03 | <0.01 | 0.01 | 0.01 |
| Treat yourself by tonic health supplements | Handgrip strength | <0.01 | <0.01 | 1.01 | 0.31 | <0.01,<0.01 | <0.01 | 0.06 | 0.01 |
| Treat yourself by tonic health supplements | Balance | 0.02 | 0.02 | 0.85 | 0.39 | <0.01,0.05 | 0.02 | 0.04 | 0.08 |
| Treat yourself by tonic health supplements | Chair stand test | <0.01 | 0.01 | 0.32 | 0.75 | <0.01,0.02 | <0.01 | 0.01 | 0.01 |
| Treat yourself by consumed traditional herbal medicines | Hip fractures | 0.19 | 0.05 | 3.75 | <0.01* | 0.09,0.29 | 0.19 | 0.08 | 0.75 |
| Treat yourself by consumed traditional herbal medicines | Age | <0.01 | <0.01 | 0.57 | 0.57 | <0.01,<0.01 | <0.01 | 0.02 | <0.01 |
| Treat yourself by consumed traditional herbal medicines | Gender | <0.01 | 0.03 | <0.01 | 0.51 | <0.01,0.04 | <0.01 | <0.01 | <0.01 |
| Treat yourself by consumed traditional herbal medicines | History of falls | 0.04 | 0.02 | 2.09 | 0.04* | <0.01,0.08 | 0.04 | 0.06 | 0.17 |
| Treat yourself by consumed traditional herbal medicines | Smoke | <0.01 | 0.03 | <0.01 | 0.94 | <0.01,0.05 | <0.01 | <0.01 | <0.01 |
| Treat yourself by consumed traditional herbal medicines | Hypertension | <0.01 | 0.02 | <0.01 | 0.31 | <0.01,0.02 | <0.01 | <0.01 | <0.01 |
| Treat yourself by consumed traditional herbal medicines | Dyslipidemia | 0.01 | 0.02 | 0.53 | 0.60 | <0.01,0.06 | 0.01 | 0.02 | 0.05 |
| Treat yourself by consumed traditional herbal medicines | Asthma | <0.01 | 0.05 | <0.01 | 0.56 | <0.01,0.07 | <0.01 | <0.01 | <0.01 |
| Treat yourself by consumed traditional herbal medicines | Cancer or malignant tumor | 0.02 | 0.08 | 0.28 | 0.78 | <0.01,0.18 | 0.02 | 0.01 | 0.09 |
| Treat yourself by consumed traditional herbal medicines | Chronic lung diseases | <0.01 | 0.04 | <0.01 | 0.44 | <0.01,0.04 | <0.01 | <0.01 | <0.01 |
| Treat yourself by consumed traditional herbal medicines | Liver disease | 0.02 | 0.04 | 0.64 | 0.52 | <0.01,0.09 | 0.02 | 0.02 | 0.09 |
| Treat yourself by consumed traditional herbal medicines | Heart problems | 0.04 | 0.02 | 1.87 | 0.06 | <0.01,0.08 | 0.04 | 0.06 | 0.16 |
| Treat yourself by consumed traditional herbal medicines | Stroke | 0.12 | 0.04 | 2.90 | <0.01* | 0.04,0.20 | 0.12 | 0.08 | 0.48 |
| Treat yourself by consumed traditional herbal medicines | Kidney disease | 0.10 | 0.03 | 3.49 | <0.01* | 0.04,0.16 | 0.10 | 0.08 | 0.40 |
| Treat yourself by consumed traditional herbal medicines | Stomach or other digestive disease | <0.01 | 0.02 | 0.16 | 0.87 | <0.01,0.04 | <0.01 | 0.01 | 0.01 |
| Treat yourself by consumed traditional herbal medicines | Emotional nervous or psychiatric problems | 0.01 | 0.07 | 0.08 | 0.94 | <0.01,0.13 | 0.01 | <0.01 | 0.02 |
| Treat yourself by consumed traditional herbal medicines | Memory related disease | <0.01 | 0.09 | <0.01 | 0.80 | <0.01,0.16 | <0.01 | <0.01 | <0.01 |
| Treat yourself by consumed traditional herbal medicines | Arthritis or rheumatism | 0.01 | 0.02 | 0.55 | 0.58 | <0.01,0.04 | 0.01 | 0.02 | 0.04 |
| Treat yourself by consumed traditional herbal medicines | Handgrip strength | <0.01 | <0.01 | 1.57 | 0.12 | <0.01,<0.01 | <0.01 | 0.07 | 0.01 |
| Treat yourself by consumed traditional herbal medicines | Balance | <0.01 | 0.01 | <0.01 | 0.08 | <0.01,<0.01 | <0.01 | <0.01 | <0.01 |
| Treat yourself by consumed traditional herbal medicines | Chair stand test | <0.01 | 0.01 | <0.01 | 0.57 | <0.01,0.01 | <0.01 | <0.01 | <0.01 |
| Diabetes | Hip fractures | 0.33 | 0.09 | 3.76 | <0.01* | 0.16,0.50 | 0.33 | 0.11 | 1.02 |
| Diabetes | Age | <0.01 | <0.01 | <0.01 | 0.60 | <0.01,<0.01 | <0.01 | <0.01 | <0.01 |
| Diabetes | Gender | 0.01 | 0.04 | 0.28 | 0.78 | <0.01,0.08 | 0.01 | 0.02 | 0.03 |
| Diabetes | History of falls | 0.04 | 0.03 | 1.51 | 0.13 | <0.01,0.10 | 0.04 | 0.05 | 0.13 |
| Diabetes | Smoke | 0.06 | 0.03 | 1.89 | 0.06 | <0.01,0.13 | 0.06 | 0.09 | 0.19 |
| Diabetes | Hypertension | <0.01 | 0.02 | 0.10 | 0.92 | <0.01,0.04 | <0.01 | <0.01 | 0.01 |
| Diabetes | Dyslipidemia | 0.01 | 0.03 | 0.38 | 0.71 | <0.01,0.07 | 0.01 | 0.01 | 0.03 |
| Diabetes | Asthma | <0.01 | 0.08 | <0.01 | 0.79 | <0.01,0.14 | <0.01 | <0.01 | <0.01 |
| Diabetes | Cancer or malignant tumor | 0.29 | 0.09 | 3.12 | <0.01* | 0.11,0.47 | 0.29 | 0.09 | 0.88 |
| Diabetes | Chronic lung diseases | 0.01 | 0.04 | 0.26 | 0.80 | <0.01,0.09 | 0.01 | 0.01 | 0.03 |
| Diabetes | Liver disease | 0.07 | 0.05 | 1.40 | 0.16 | <0.01,0.17 | 0.07 | 0.04 | 0.21 |
| Diabetes | Heart problems | 0.06 | 0.03 | 2.05 | 0.04* | <0.01,0.12 | 0.06 | 0.07 | 0.18 |
| Diabetes | Stroke | 0.05 | 0.06 | 0.82 | 0.41 | <0.01,0.17 | 0.05 | 0.02 | 0.15 |
| Diabetes | Kidney disease | 0.07 | 0.05 | 1.42 | 0.16 | <0.01,0.16 | 0.07 | 0.04 | 0.20 |
| Diabetes | Stomach or other digestive disease | <0.01 | 0.03 | <0.01 | 0.29 | <0.01,0.03 | <0.01 | <0.01 | <0.01 |
| Diabetes | Emotional nervous or psychiatric problems | <0.01 | 0.18 | <0.01 | 0.87 | <0.01,0.33 | <0.01 | <0.01 | <0.01 |
| Diabetes | Memory related disease | <0.01 | 0.18 | <0.01 | 0.65 | <0.01,0.27 | <0.01 | <0.01 | <0.01 |
| Diabetes | Arthritis or rheumatism | 0.01 | 0.02 | 0.29 | 0.77 | <0.01,0.05 | 0.01 | 0.01 | 0.02 |
| Diabetes | Handgrip strength | <0.01 | <0.01 | 0.23 | 0.82 | <0.01,<0.01 | <0.01 | 0.01 | <0.01 |
| Diabetes | Balance | <0.01 | 0.02 | <0.01 | 0.36 | <0.01,0.02 | <0.01 | <0.01 | <0.01 |
| Diabetes | Chair stand test | <0.01 | 0.01 | <0.01 | 0.18 | <0.01,0.01 | <0.01 | <0.01 | <0.01 |
| Diabetes | Nap duration | <0.01 | 0.01 | <0.01 | 0.45 | <0.01,0.01 | <0.01 | <0.01 | <0.01 |
| Diabetes | Nighttime sleep duration | 0.01 | 0.01 | 1.28 | 0.20 | <0.01,0.03 | 0.01 | 0.04 | 0.04 |
| Diabetes | Total sleep duration | <0.01 | 0.01 | 0.42 | 0.67 | <0.01,0.02 | <0.01 | 0.01 | 0.01 |
| Diabetes | Felt depressed | 0.01 | 0.01 | 0.52 | 0.60 | <0.01,0.03 | 0.01 | 0.02 | 0.02 |
| Diabetes | Treat yourself by tonic health supplements | <0.01 | 0.04 | <0.01 | 0.48 | <0.01,0.05 | <0.01 | <0.01 | <0.01 |
| Diabetes | Treat yourself by consumed traditional herbal medicines | 0.07 | 0.03 | 2.13 | 0.03* | 0.01,0.13 | 0.07 | 0.05 | 0.05 |
